# Supplementary material
Source: Springer Nature journal article supplement (https://www.springermedizin.de/resource/supplementary/12889_2011_3459_MOESM1_ESM.pdf/9489138)
Supplement: MOESM1 [file 9489138]

*Look backwards for preventing an injury in a given stage of life*

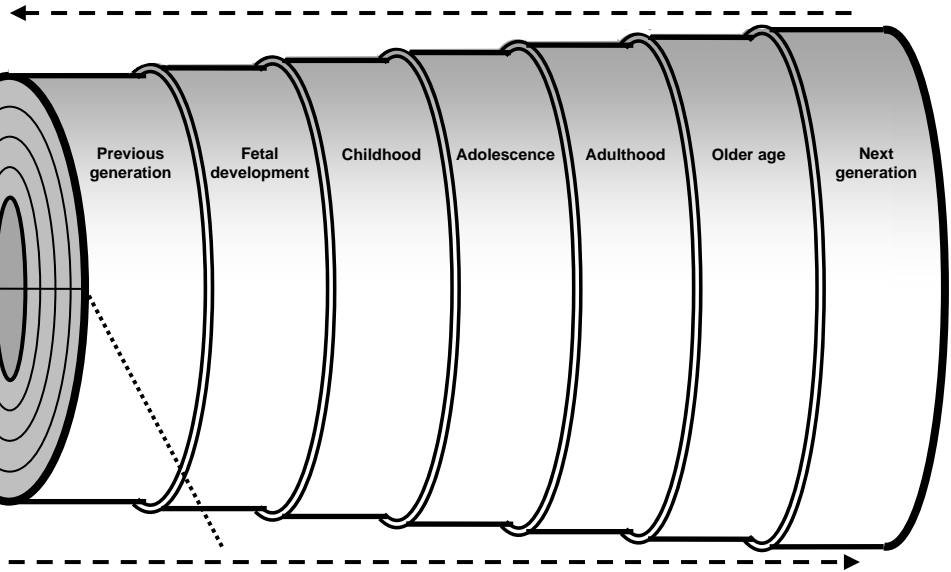

**The Telescope**

*Look forwards for the outcomes associated with an intervention, a determinant or an injury in a given stage of life*

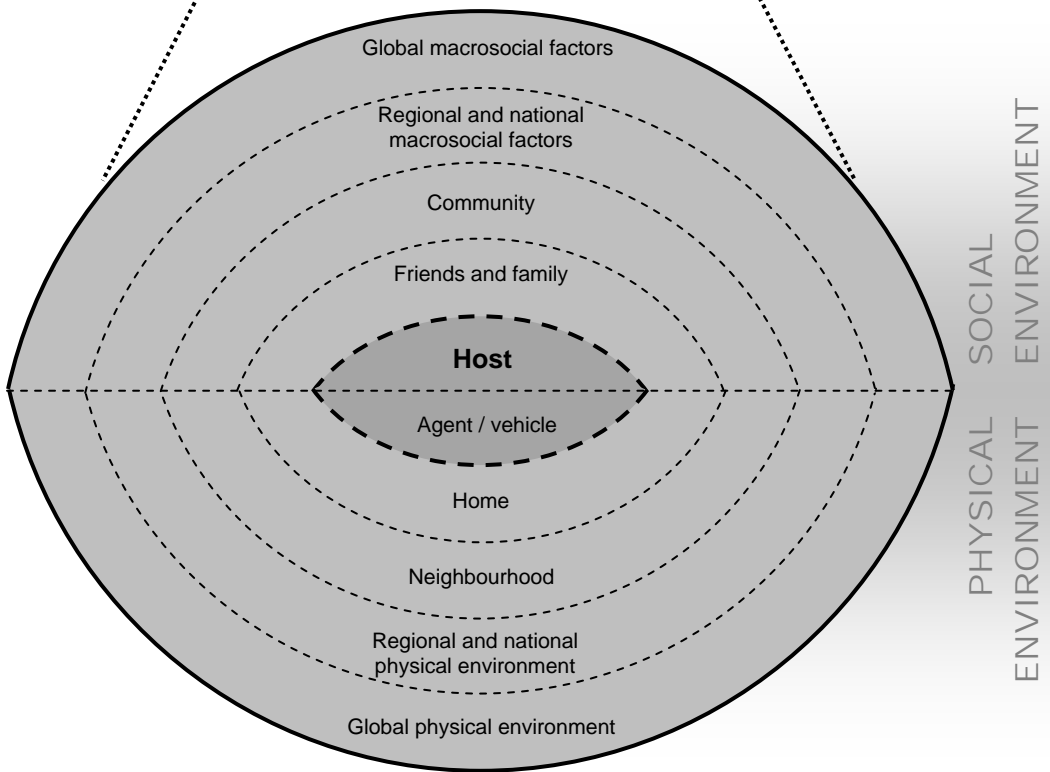

**The Lens**
